# Supplementary material
Source: HighWire-hosted journal article supplement (https://svn.smart01.highwire.org/content/10/1/95)
Supplement: inline-supplementary-material-1 [file inline-supplementary-material-1.pdf]

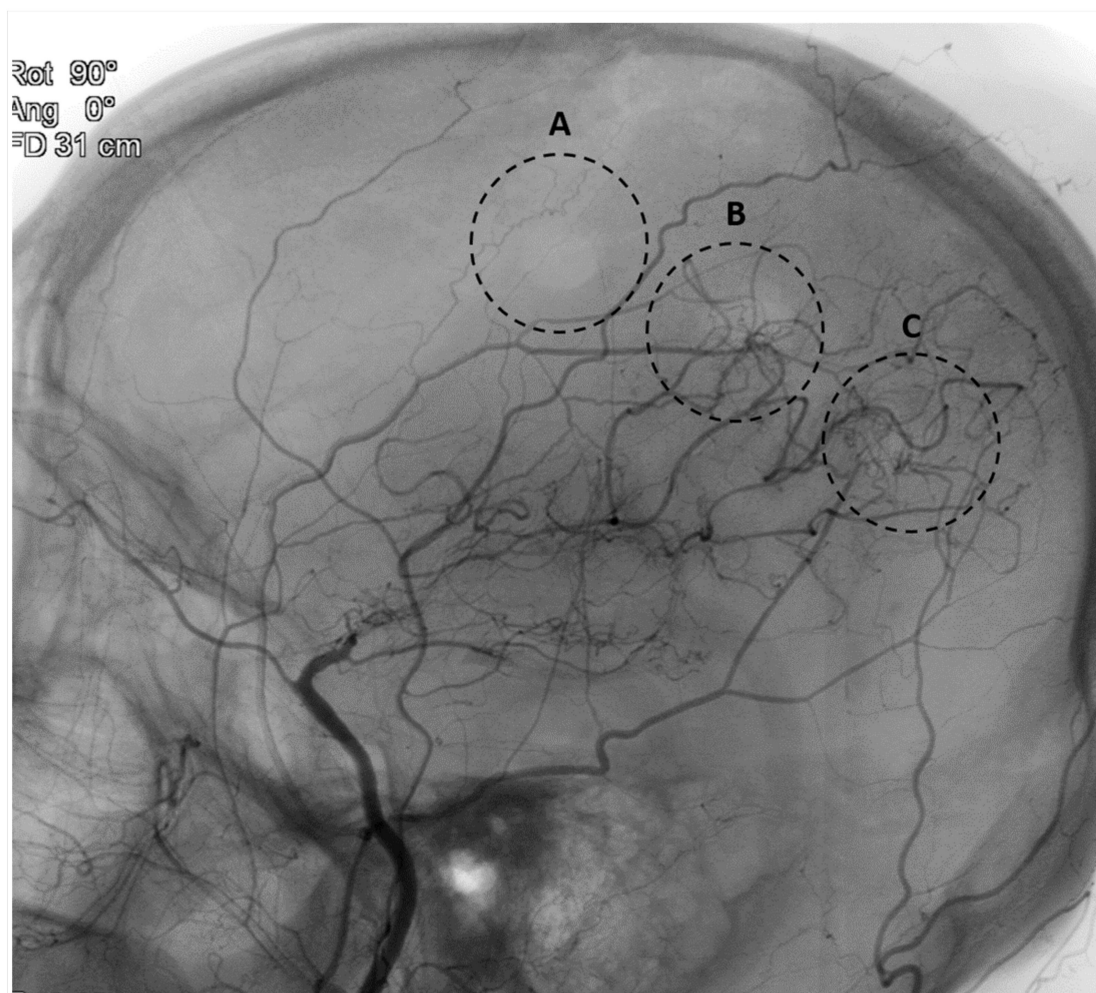

**Supplementary figure 1. A preliminary case with combined therapy illustrates the importance of mechanical barrier disruption of the dural membrane.**

- (A). No revascularization is seen in the transcalvarial burr hole without opening the dura mater.
- (B). Revascularization is documented in the burr hole with disruption of the dura mater.
- (C). Revascularization is documented in the burr hole with disruption of the dura and arachnoid mater.
